# Supplementary material
Source: Research Square preprint supplement (doi:10.21203/rs.3.rs-9047602/v1)
Supplement: Supplementary file 1 [file 17881b90aee2bed595e4afc2.docx]

**Supplemental Information**

**Proactive neural preparation across individual handwriting strokes: links to tool properties and cognitive performance**

Aya S. Ihara1*, Kae Nakajima1, Hiroki Watanabe1, Akihiro Miyamoto1, Akiyuki Kake2, Takenori Kaneda2, Yuya Hasegawa1, Yasushi Naruse1

1 Center for Information and Neural Networks, National Institute of Information and Communications Technology, and Osaka University, Kobe, Japan

2 Wacom Co., Ltd., Kazo, Japan

* Correspondence:

Aya S. Ihara

ihara@nict.go.jp

**Supplemental data for *Pen-down–locked theta/low-alpha ITC in handwriting***

**Supplementary Table 1.** Specific frequency and time windows of significant theta band inter-trial coherence (ITC).

| Task | Ch | Freq. lower (Hz) | Freq. upper (Hz) | Time start (ms) | Time end (ms) |
| --- | --- | --- | --- | --- | --- |
| Calculation | C3 | 4 | 8 | -30 | 220 |
|  | C4 | 3.2 | 8 | -20 | 210 |
|  | O1 | 3.2 | 10 | -110 | 180 |
|  | O2 | 3.2 | 10 | -110 | 190 |
| Copying | C3 | 3.2 | 12 | -60 | 240 |
|  | C4 | 3.2 | 10 | -50 | 260 |
|  | O1 | 3.2 | 11.2 | -110 | 290 |
|  | O2 | 3.2 | 9.2 | -120 | 300 |

Note. Ch: EEG electrodes. Time start (ms) and Time end (ms) columns are expressed relative to the pen-down (stroke onset), which is designated as 0 ms.

**Supplementary Table 2.** Type III analysis of variance for theta band (4–8 Hz) inter-trial-coherence (ITC): effects of task and pen-tip friction (LMM results)

| Ch | Fixed effect | F | df | Holm-adjusted  p-values |
| --- | --- | --- | --- | --- |
| C3 | Task | 6.22 | 1, 80 | 0.168 |
|  | Pen-tip friction | 1.29 | 2, 80 | 1.000 |
|  | Task × Pen-tip friction | 1.09 | 2, 80 | 1.000 |
| C4 | Task | 6.11 | 1, 80 | 0.168 |
|  | Pen-tip friction | 1.28 | 2, 80 | 1.000 |
|  | Task × Pen-tip friction | 0.22 | 2, 80 | 1.000 |
| O1 | Task | 6.31 | 1, 80 | 0.168 |
|  | Pen-tip friction | 0.15 | 2, 80 | 1.000 |
|  | Task × Pen-tip friction | 0.42 | 2, 80 | 1.000 |
| O2 | Task | 4.60 | 1, 80 | 0.315 |
|  | Pen-tip friction | 0.55 | 2, 80 | 1.000 |
|  | Task × Pen-tip friction | 0.76 | 2, 80 | 1.000 |

Note. Ch: EEG electrodes. F and df: *F* values and degrees of freedom from Type III *F*-tests using the Satterthwaite method. P-values were adjusted for multiple comparisons using the Holm method for 12 comparisons. No significant effect was observed (*p* > 0.05).

**Supplementary Table 3.** Significance of theta band (4–8 Hz) power relative to zero in written calculation and Kanji copying tasks (paired t-tests)

| Task | Ch | df | t value | p-value |
| --- | --- | --- | --- | --- |
| Calculation | C3 | 15 | -3.42 | 0.998 |
|  | C4 | 15 | -2.75 | 0.993 |
|  | O1 | 15 | -0.40 | 0.654 |
|  | O2 | 15 | -0.99 | 0.832 |
| Copying | C3 | 15 | -2.35 | 0.984 |
|  | C4 | 15 | -2.44 | 0.986 |
|  | O1 | 15 | -1.88 | 0.960 |
|  | O2 | 15 | -1.81 | 0.955 |

Note. Ch: EEG electrodes. df: Degrees of freedom.

**Supplemental data for *Effects of task and pen-tip friction on pen-down–locked EEG amplitude***

**Supplementary Table 4.** Results of post hoc comparisons among friction conditions on electroencephalography (EEG)

| Phase | Ch | Contrast | Estimate | SE | df | t value | Holm-adjusted  p-values |  |
| --- | --- | --- | --- | --- | --- | --- | --- | --- |
| Pre–pen-down | C3 | LF - MF | -0.140 | 0.055 | 106378.6 | -2.557 | 0.021 | * |
|  |  | LF - HF | 0.097 | 0.055 | 106333.4 | 1.784 | 0.075 |  |
|  |  | MF - HF | 0.238 | 0.055 | 106315.6 | 4.299 | 5.14 × 10-5 | *** |
| Early post–pen-down | C3 | LF - MF | -0.034 | 0.058 | 106279.6 | -0.575 | 0.566 |  |
|  |  | LF - HF | 0.194 | 0.058 | 106174.9 | 3.333 | 0.002 | ** |
|  |  | MF - HF | 0.228 | 0.059 | 106130.0 | 3.867 | 3.31 × 10-4 | *** |
|  | O1 | LF - MF | -0.042 | 0.064 | 106422.1 | -0.668 | 0.504 |  |
|  |  | LF - HF | 0.202 | 0.063 | 106404.0 | 3.182 | 0.003 | ** |
|  |  | MF - HF | 0.244 | 0.064 | 106397.3 | 3.810 | 4.17 × 10-4 | *** |

Note. Ch: EEG electrodes. LF, MF, and HF: Low-, middle-, and high-friction pen tips. Contrast: Specific pairwise comparison between two factor levels. Estimate: Estimated mean difference between two contrasting levels based on the model. SE: Standard error.df: degrees of freedom estimated using Satterthwaite approximation. Statistical significance levels: **p* < 0.05, ***p* < 0.01, and ****p* < 0.001.

**Supplemental data for *Stroke-level associations between EEG and handwriting kinematics/kinetics***

This section provides a comprehensive overview of the statistical analyses of the kinematic and kinetic features, complementing the findings presented in the main text. We applied LMMs following the same structure as the writing ERP and ITC analyses: the model included *Task*, *Pen-tip friction*, and their interaction as fixed effects and *Participant* as a random effect. We present the full LMM results in Supplementary Table 5 and detail the post-hoc analyses conducted to elucidate the significant *Task* × *Pen-tip friction* interaction, examining *Pen-tip friction* effects separately for the copying (Supplementary Table 6) and calculation tasks (Supplementary Table 7).

**Supplementary Table 5.** Type III analysis of variance for specific kinematic and kinetic variables: effects of task and pen-tip friction (LMM Results).

| Variable | Fixed effects | F value | df (Num, Den) | Holm-adjusted p-values |  |
| --- | --- | --- | --- | --- | --- |
| Stroke length | Task | 75675.9 | (1, 106443) | < 2.66 × 10-15 | *** |
|  | Pen-tip friction | 43.8 | (2, 106433) | < 2.66× 10-15 | *** |
|  | Task × Pen-tip friction | 21.6 | (2, 106431) | 4.25 × 10-10 | *** |
| Stroke duration | Task | 369.3 | (1, 106431) | < 2.66 × 10-15 | *** |
|  | Pen-tip friction | 86.4 | (2, 106428) | < 2.66 × 10-15 | *** |
|  | Task × Pen-tip friction | 40.0 | (2, 106428) | < 2.66 × 10-15 | *** |
| Maximum velocity | Task | 17700.8 | (1, 106431) | < 2.66 × 10-15 | *** |
|  | Pen-tip friction | 256.3 | (2, 106428) | < 2.66 × 10-15 | *** |
|  | Task × Pen-tip friction | 51.7 | (2, 106428) | < 2.66 × 10-15 | *** |
| Maximum pressure | Task | 2840.9 | (1, 106428) | < 2.66 × 10-15 | *** |
|  | Pen-tip friction | 6047.2 | (2, 106427) | < 2.66 × 10-15 | *** |
|  | Task × Pen-tip friction | 144.1 | (2, 106427) | < 2.66 × 10-15 | *** |

Note. df: degrees of freedom from Type III *F*-tests using the Satterthwaite method. Num: Numerator degrees of freedom. Den: Denominator degrees of freedom. P-values were adjusted for multiple comparisons using the Holm method for 12 comparisons. Statistical significance level: ****p* < 0.001.

**Supplementary Table 6.** Results of post hoc comparisons among friction conditions on kinematic and kinetic features in the calculation task

| Variable | Contrast | Estimate | SE | df | t value | Holm-adjusted  p-values |  |
| --- | --- | --- | --- | --- | --- | --- | --- |
| Stroke length | LF – MF | 0.369 | 0.043 | 106431 | 8.6 | < 2.22× 10-16 | *** |
|  | LF – HF | 0.359 | 0.043 | 106431 | 8.4 | < 2.22× 10-16 | *** |
|  | MF – HF | -0.010 | 0.044 | 106432 | -0.2 | 0.8234 |  |
| Stroke duration | LF – MF | -5.880 | 1.870 | 106428 | -3.1 | 0.005 | ** |
|  | LF – HF | -1.760 | 1.870 | 106428 | -0.9 | 0.3451 |  |
|  | MF – HF | 4.110 | 1.890 | 106428 | 2.2 | 0.0595 |  |
| Maximum velocity | LF – MF | 0.012 | 0.001 | 106428 | 9.0 | < 2.22 × 10-16 | *** |
|  | LF – HF | 0.007 | 0.001 | 106427 | 4.9 | 1.94 × 10-6 | *** |
|  | MF – HF | -0.006 | 0.001 | 106428 | -4.1 | 5.11 × 10-5 | *** |
| Maximum pressure | LF – MF | 0.065 | 0.001 | 106427 | 70.0 | < 2.22 × 10-16 | *** |
|  | LF – HF | 0.060 | 0.001 | 106427 | 65.2 | < 2.22 × 10-16 | *** |
|  | MF – HF | -0.004 | 0.001 | 106427 | -4.7 | 2.15 × 10-6 | *** |

Note. LF, MF, and HF: Low-, middle-, and high-friction pen tips. Contrast: Specific pairwise comparison between two factor levels. Estimate: Estimated mean difference between two contrasting levels based on the model. SE: Standard error.df: degrees of freedom estimated using Satterthwaite approximation. Statistical significance levels: ***p* < 0.01, ****p* < 0.001.

**Supplementary Table 7**. Results of post hoc comparisons among friction conditions on kinematic and kinetic features in the copying task

| Variable | Contrast | Estimate | SE | df | t value | Holm-adjusted  p-values |  |
| --- | --- | --- | --- | --- | --- | --- | --- |
| Stroke length | LF - MF | 0.079 | 0.031 | 106432 | 2.5 | 0.036 | * |
|  | LF - HF | 0.049 | 0.031 | 106435 | 1.6 | 0.230 |  |
|  | MF - HF | -0.030 | 0.031 | 106434 | -0.9 | 0.344 |  |
| Stroke duration | LF - MF | -17.090 | 1.360 | 106428 | -12.6 | < 2.22 × 10-16 | *** |
|  | LF - HF | 7.840 | 1.350 | 106429 | 5.8 | 6.33 × 10-9 | *** |
|  | MF - HF | 24.940 | 1.360 | 106428 | 18.3 | < 2.22 × 10-16 | *** |
| Maximum velocity | LF - MF | 0.024 | 0.001 | 106428 | 24.6 | < 2.22 × 10-16 | *** |
|  | LF - HF | 0.002 | 0.001 | 106428 | 2.1 | 0.032 | * |
|  | MF - HF | -0.022 | 0.001 | 106428 | -22.5 | < 2.22 × 10-16 | *** |
| Maximum pressure | LF - MF | 0.048 | 0.001 | 106427 | 71.2 | < 2.22 × 10-16 | *** |
|  | LF - HF | 0.044 | 0.001 | 106427 | 65.3 | < 2.22 × 10-16 | *** |
|  | MF - HF | -0.004 | 0.001 | 106427 | -6.3 | 2.19 × 10-10 | *** |

Note. LF, MF, and HF: Low-, middle-, and high-friction pen tips. Contrast: Specific pairwise comparison between two factor levels. Estimate: Estimated mean difference between two contrasting levels based on the model. SE: Standard error.df: degrees of freedom estimated using Satterthwaite approximation. Statistical significance levels: **p* < 0.05, ***p* < 0.01, and ****p* < 0.001.


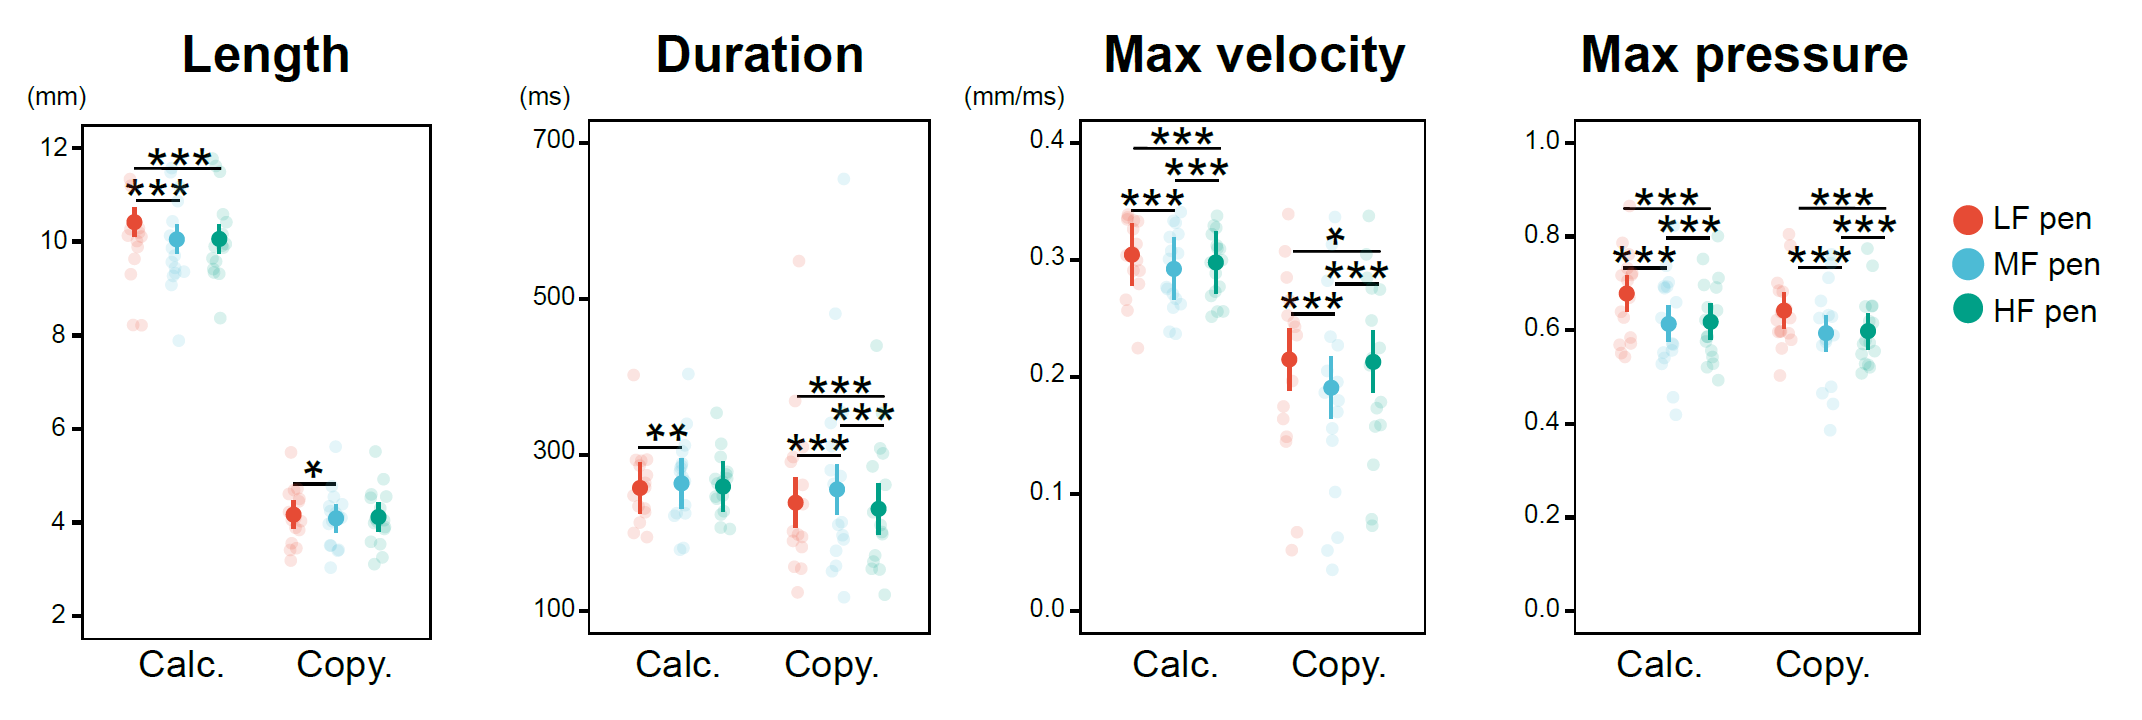


**Supplemental Fig. 1.** Differences in kinematic and kinetic data across pen tips

**Supplementary Table 8.** Type III analysis of variance for specific kinematic and kinetic variables: effects of pre-pen-down EEG amplitude and task (LMM Results)

| Variable | Fixed effect | df (Num, Den) | F value | p value |  |
| --- | --- | --- | --- | --- | --- |
| Stroke length | Pre–pen-down EEG | (1, 106429) | 0.87 | 0.351 |  |
| Task | (1, 106443) | 75720 | < 2.2× 10-16 | *** |
| Pre–pen-down EEG ×Task | (1, 106428) | 0.33 | 0.566 |  |
| Stroke duration | Pre–pen-down EEG | (1, 106427) | 7.39 | 0.007 | ** |
| Task | (1, 106431) | 376.41 | < 2.2× 10-16 | *** |
| Pre–pen-down EEG ×Task | (1, 106427) | 0.32 | 0.571 |  |
| Maximum velocity | Pre–pen-down EEG | (1, 106427) | 8.21 | 0.004 | ** |
| Task | (1, 106431) | 17513.2 | < 2.2 × 10-16 | *** |
| Pre–pen-down EEG × Task | (1, 106427) | 3.01 | 0.083 |  |
| Maximum pressure | Pre–pen-down EEG | (1, 106427) | 12.87 | 3.35 × 10-4 | *** |
| Task | (1, 106428) | 2624.26 | < 2.2 × 10-16 | *** |
| Pre–pen-down EEG × Task | (1, 106427) | 9.32 | 0.002 | ** |

Note. df: Degrees of freedom. Num: Numerator degrees of freedom. Den: Denominator degrees of freedom. Statistical significance levels: **p* < 0.05, ***p* < 0.01, and ****p* < 0.001.

**Supplemental data for *Effect of mood states on pre–pen-down activity***

To examine whether mood states during writing tasks varied according to the pen-tip friction condition, we first conducted Friedman tests on the subjective ratings of frustration and motivation for each task. When a significant main effect of pen-tip friction was found, post hoc comparisons between pen tips were conducted using the Wilcoxon signed-rank test, with exact two-tailed *p*-values computed using the Monte Carlo method. The Holm correction was applied to adjust for multiple comparisons.

For frustration, the effect of pen-tip friction was significant (*χ*²(2) = 5.81, *p* = 0.047) in the calculation task but not in the copying task (*χ*²(2) = 3.17, *p* = 0.221). For motivation, a significant effect of pen-tip friction was observed in the copying task (χ²(2) = 7.06, *p* = 0.029), while no significant effect was found in the calculation task (*χ*²(2) = 5.35, *p* = 0.076). Thus, the significant effects of pen-tip friction on subjective mood were limited to frustration in the calculation task and motivation in the copying task, with no significant pairwise differences observed in the post-hoc tests (Holm-adjusted *p* > 0.05).

**
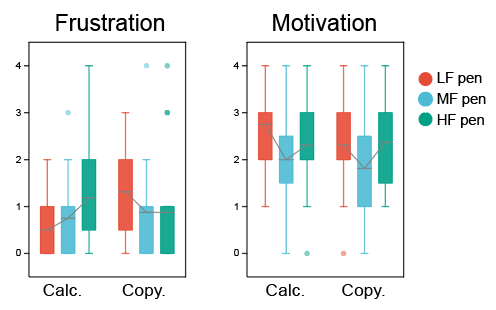
**

**Supplementary Fig. 2.** The left panel displays subjective frustration ratings, and the right panel displays subjective motivation ratings. The y-axis represents subjective ratings on a 5-point scale (ranging from 0 to 4, with higher values indicating greater frustration or motivation). The x-axis denotes the task type: "Calc." for the calculation task and "Copy." for the copying task. Box plots illustrate the median (horizontal line within the box), interquartile range (IQR, the box), and whiskers extending to 1.5 times the IQR. Individual data points are represented by dots. Although Friedman tests showed a significant overall effect of pen-tip friction on frustration in the calculation task and motivation in the copying task, subsequent post-hoc tests with Holm correction did not reveal significant pairwise differences among the pen tips.

**Supplementary Table 9.** ANOVA for LMM on pre–pen-down ERP amplitude at C3 related to frustration

| Fixed effect | df (Num, Den) | F value | p value |  |
| --- | --- | --- | --- | --- |
| Task | (1, 80.1) | 1.030 | 0.313 |  |
| Pen-tip friction | (2, 80.1) | 5.628 | 0.005 | ** |
| Frustration | (1, 89.3) | 4.353 | 0.040 | * |
| Task × Pen-tip friction | (2, 80.4) | 0.809 | 0.449 |  |
| Task × Frustration | (1, 83.4) | 15.259 | 1.90× 10-4 | *** |

**Supplementary Table 10.** ANOVA for LMM on pre–pen-down ERP amplitude at C3 related to motivation

| Fixed effect | df (Num, Den) | F value | p value |  |
| --- | --- | --- | --- | --- |
| Task | (1, 80.0) | 0.959 | 0.330 |  |
| Pen-tip friction | (2, 81.4) | 6.857 | 0.002 | ** |
| Motivation | (1, 95.3) | 3.844 | 0.053 |  |
| Task × Pen-tip friction | (2, 79.8) | 1.916 | 0.154 |  |
| Task × Motivation | (1, 81.5) | 7.211 | 0.009 | *** |

Note. df: Degrees of freedom. Num: Numerator degrees of freedom. Den: Denominator degrees of freedom. Statistical significance levels: **p* < 0.05, ***p* < 0.01, and ****p* < 0.001.

**Supplemental data for *Neural and kinematic/kinetic correlates of calculation performance***

**Supplementary Table S11**. Summary of top 10 candidate LMMs for accuracy

| Model | df | logLik | AICc | Delta | Weight |
| --- | --- | --- | --- | --- | --- |
| **1+3+7+9** | **7** | **-158.86** | **334.51** | **0** | **0.3** |
| **1+3+7+8+9** | **8** | **-158.41** | **336.5** | **1.99** | **0.11** |
| 1+3+6+7+9 | 8 | -158.51 | 336.72 | 2.21 | 0.1 |
| 1+2+3+7+9 | 8 | -158.58 | 336.86 | 2.35 | 0.09 |
| 1+3+7+9+10 | 8 | -158.63 | 336.94 | 2.43 | 0.09 |
| 1+3+4+7+9 | 8 | -158.78 | 337.24 | 2.73 | 0.08 |
| 1+3+5+7+9 | 8 | -158.86 | 337.4 | 2.89 | 0.07 |
| 1+3+9 | 6 | -161.96 | 337.96 | 3.45 | 0.05 |
| 1+3+8+9+10 | 8 | -159.26 | 338.2 | 3.69 | 0.05 |
| 1+3+8+9 | 7 | -160.71 | 338.23 | 3.71 | 0.05 |

Note. Models with a delta AICc within 2.0 of the best model are shown in bold.

Term codes: Fixed effects included in models (all listed variables are z-scored).

1: Pre–pen-down ERP amplitude

2: Early post–pen-down ERP amplitude

3: Late post–pen-down ERP amplitude

4: Pre–pen-down ERP amplitude

5: Early post–pen-down ERP amplitude

6: Late post–pen-down ERP amplitude

7: Stroke length

8: Stroke duration

9: Maximum pressure

10: Maximum velocity.

df: Degrees of freedom of the model.

logLik: The maximized log-likelihood of the model.

AICc: Second-order Akaike Information Criterion. Lower AICc values indicate a better-fitting model.

Delta: Difference in AICc between the current and top-ranked models (model with the lowest AICc).

Weight: The Akaike weight represents the probability that the current model is the best among the candidate sets (these weights are normalized within the top ten models and do not represent absolute weights from the full model set).
